# Supplementary material
Source: PubMed Central journal article supplement (PMC9161115)
Supplement: jamadermatol-e221863-s001.pdf [file jamadermatol-e221863-s001.pdf]

## Supplemental Online Content

Enevold C, Loft N, Bregnhøj A, et al. Circulating brodalumab levels and therapy outcomes in patients with psoriasis treated with brodalumab: a case series. *JAMA Dermatol*. Published online June 1, 2022. doi:10.1001/jamadermatol.2022.1863

### **eTable.** Baseline Patient Characteristics

This supplemental material has been provided by the authors to give readers additional information about their work.

Table. Baseline Patient Characteristics

| Characteristic                                                                       | No. (%)      |
|--------------------------------------------------------------------------------------|--------------|
| No.                                                                                  | 20           |
| Women                                                                                | 7 (35)       |
| Men                                                                                  | 13 (65)      |
| Age, median (range), y                                                               | 50 (19-66)   |
| Body weight, median (range), kg                                                      | 103 (59-182) |
| BMI, median (range), kg/m <sup>2</sup>                                               | 32 (21-50)   |
| Baseline PASI, median (range)                                                        | 14 (7-26)    |
| Previous therapy failure                                                             |              |
| Secukinumab-only                                                                     | 14 (70)      |
| Ixezumab-only                                                                        | 1 (5)        |
| Secukinumab and ixekizumab                                                           | 5 (25)       |
| TNF-alpha inhibitor (adalimumab, infliximab, or etanercept)                          | 16 (80)      |
| IL-12/IL-23 inhibitor (ustekinumab, guselkumab)                                      | 12 (60)      |
| TNF-alpha or IL-12/IL-23 inhibitor                                                   | 18 (90)      |
| Previous therapy failures on other biologics or small molecules, median (range), No. | 2 (0-6)      |

Abbreviations: BMI, body mass index; IL, interleukin; PASI, psoriasis area and severity indexes; TNF, tumor necrosis factor.
